# Supplementary material
Source: publisher site journal article supplement (https://www.spandidos-publications.com/1457/downloadSupplementary)

Figure S1. Hematoxylin and eosin staining of tissue sections from metastatic nodules in nude mice. Magnification, x4. The tumor foci are clearly evident within the mucosa of the intestinal epithelium.

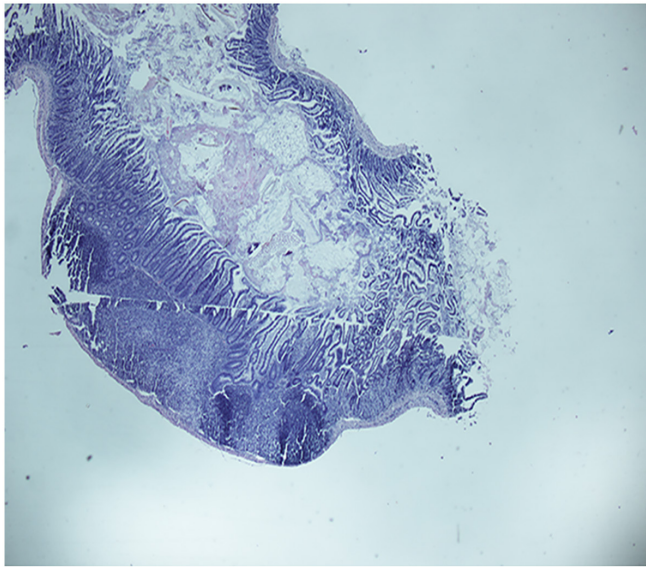

Supplement: Supplementary file 1 [file downloadSupplementary]
